# Supplementary material for: Endogenous Epoxygenases Are Modulators of Monocyte/Macrophage Activity
Source: PubMed Central journal article supplement (PMC3197524; doi:10.1371/journal.pone.0026591), 2011-10-19
Supplement: pone.0026591.s001.pdf [file pone.0026591.s001.pdf]

## Supplemental Figure 1

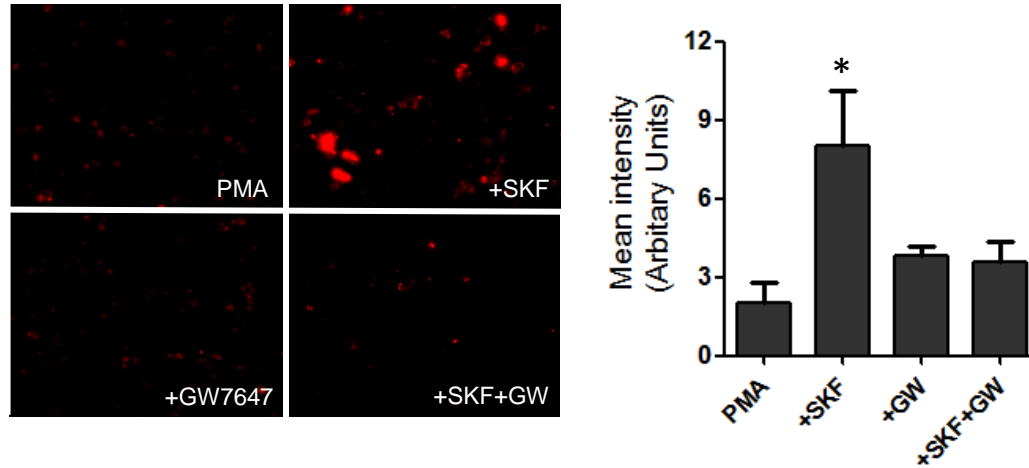

**Supplemental Figure S1: Epoxygenase inhibition increase macrophage lipid uptake.** SKF525A treatment (10 $\mu$ M; 72h) increases the uptake of DiI-acetylated LDL which is inhibited if co-treated with the selective PPAR $\alpha$  ligand GW7647 (100nM). Cells were initially pre-treated with PMA (5nM) for 24h. Left panels show representative micrographs (x400) of ac-LDL uptake, figure shows densometric analysis (Image J) of ac-LDL uptake represented as mean  $\pm$  SEM of n=4 experiments.

## Supplemental Figure 2

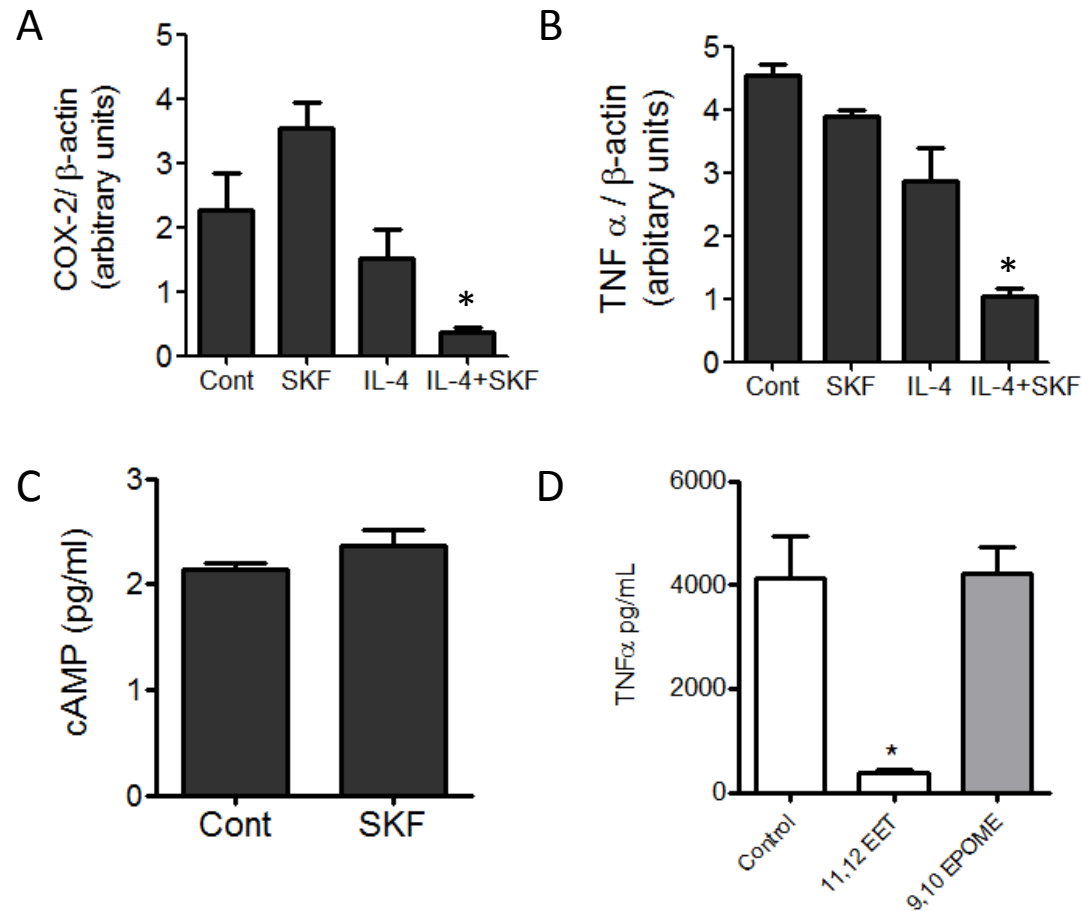

**Supplemental Figure S2:** (A & B) shows COX-2 mRNA (C) and TNF $\alpha$  mRNA (D) relative to  $\beta$ -actin in THP-1 cells treated with vehicle (Cont), or treated with SKF525A (10 $\mu$ M), IL-4 (20ng/ml or IL-4 with SKF525A for 7h. Data represents mean  $\pm$  SEM of n=4 experiments. \* indicates p<0.05; one way ANOVA compared to control. (C) Intracellular cAMP levels (pg/ml) are unchanged in THP-1 cells treated with vehicle control (Cont) or SKF525A (10 $\mu$ M) for 7h. (D) Shows the comparison of inhibition of basal TNF $\alpha$  release from THP-1 cells treated with 1 $\mu$ M of 11,12-EET or 9,10-EPOME. Data represents mean  $\pm$  SEM of n=3 experiments.
