# Supplementary material for: Endogenous Epoxygenases Are Modulators of Monocyte/Macrophage Activity
Source: PubMed Central journal article supplement (PMC3197524; doi:10.1371/journal.pone.0026591), 2011-10-19
Supplement: pone.0026591.s002.pdf [file pone.0026591.s002.pdf]

## Supplemental Figure 2

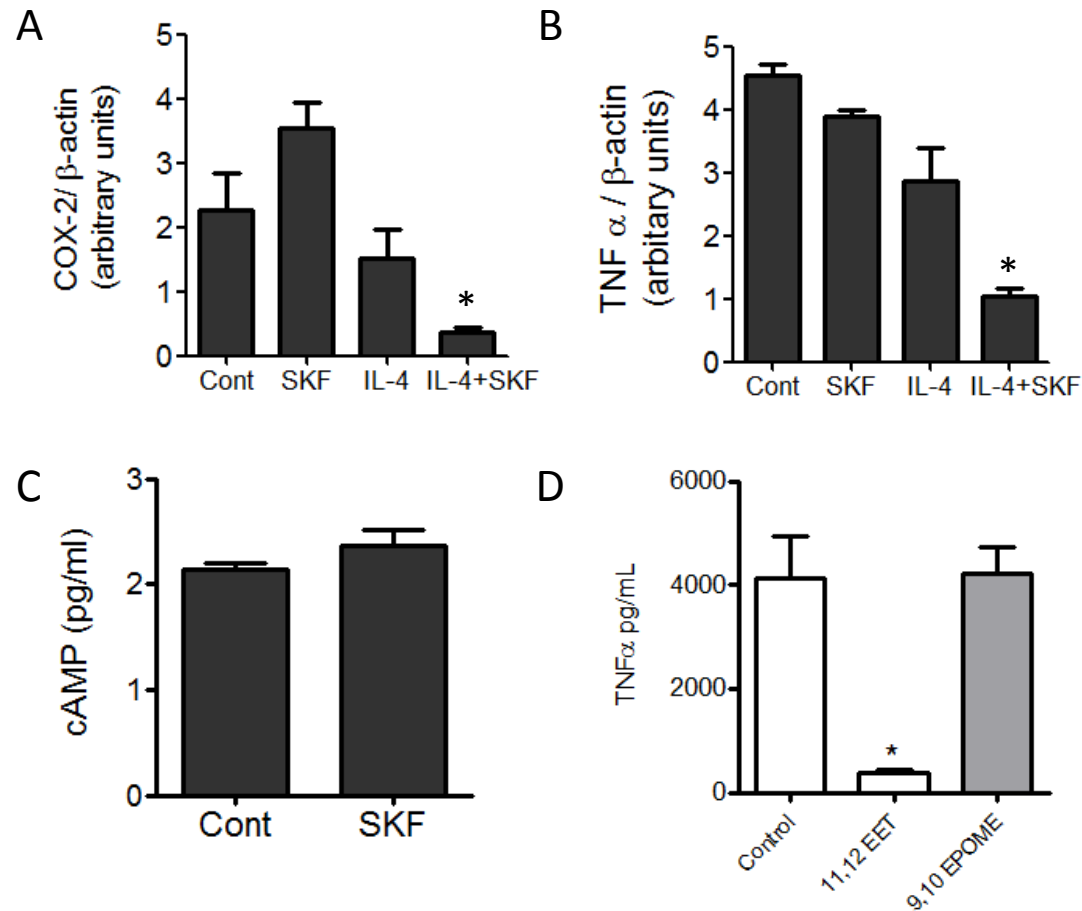

**Supplemental Figure S2: (A & B)** shows COX-2 mRNA (C) and TNF $\alpha$  mRNA (D) relative to  $\beta$ -actin in THP-1 cells treated with vehicle (Cont), or treated with SKF525A (10 $\mu$ M), IL-4 (20ng/ml or IL-4 with SKF525A for 7h. Data represents mean  $\pm$  SEM of n=4 experiments. \* indicates p<0.05; one way ANOVA compared to control. **(C)** Intracellular cAMP levels (pg/ml) are unchanged in THP-1 cells treated with vehicle control (Cont) or SKF525A (10 $\mu$ M) for 7h. **(D)** Shows the comparison of inhibition of basal TNF $\alpha$  release from THP-1 cells treated with 1 $\mu$ M of 11,12-EET or 9,10-EPOME. Data represents mean  $\pm$  SEM of n=3 experiments.
